# Supplementary material for: Low Use of Mental Health Services Among Older Americans With Mood and Anxiety Disorders
Source: Atypon-hosted journal article supplement (doi:10.1176/appi.ps.201100121), 2012-01-01
Supplement: pss6301_66_ds.pdf [file pss6301_66_ds.pdf]

*eFigure 1. Probability of not using services by predisposing characteristics*

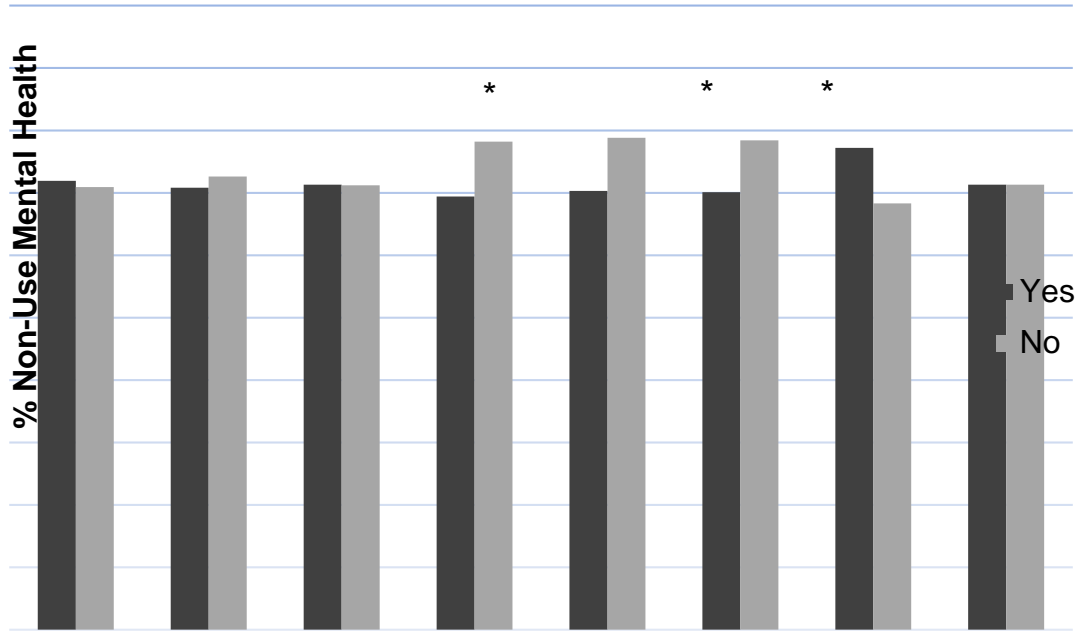

*eFigure 2. Probability of not using services by enabling characteristics*

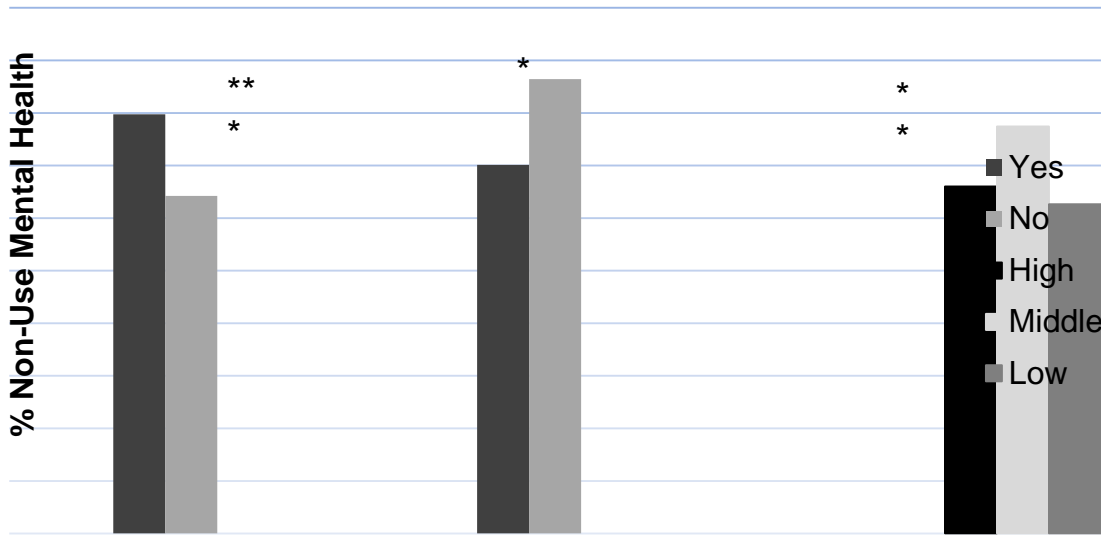

**eFigure 3. Probability of not using services by need factors**

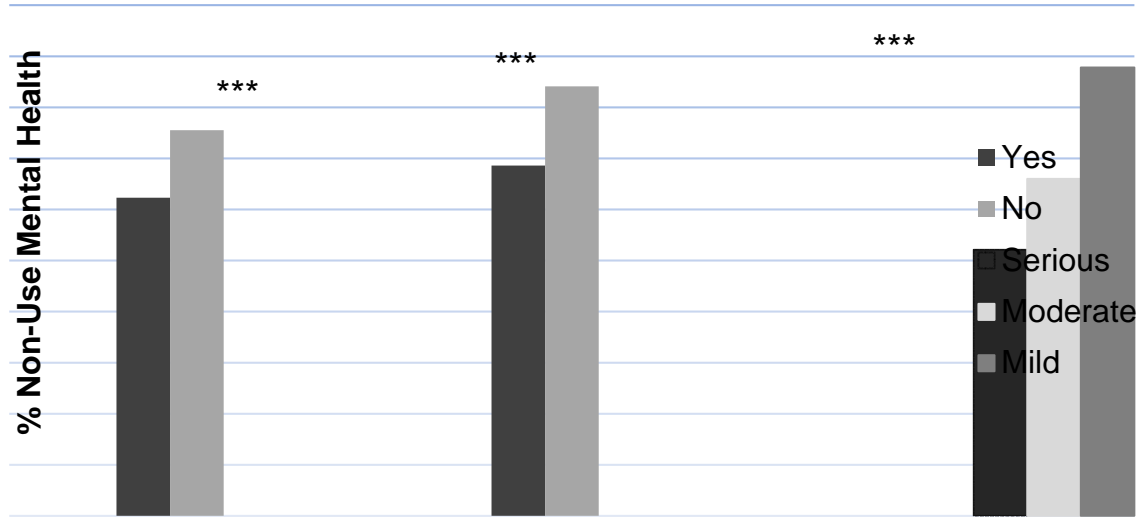

**eFigure 4. Mean disability scores by domain and services non-use/use**

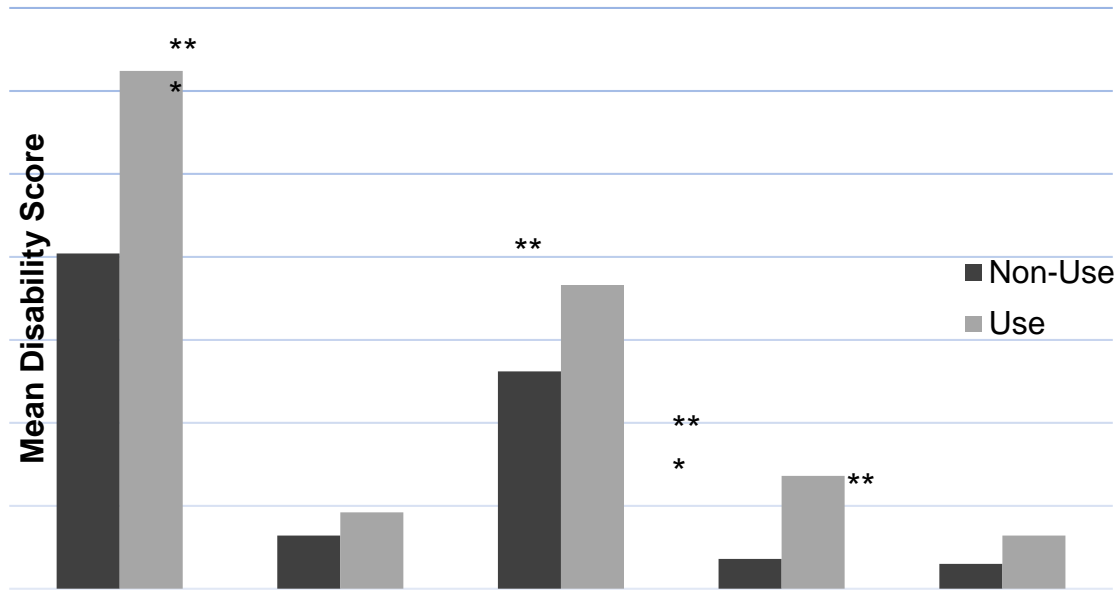

Abbreviations: CVD = medical conditions related to cardiovascular disease; M/A = Mood/Anxiety; \* $p \leq .20$ ; \*\* $p \leq .10$ ; \*\*\* $p < .05$
